# Supplementary material
Source: MDPI journal article supplement (https://www.mdpi.com/2071-1050/11/3/736)
Supplement: s1 [file s1]

Table S3. WILD WHEAT

=== Run information ===

Scheme: weka.classifiers.bayes.NaiveBayes  
Relation: WekaExcel  
Instances: 22  
Test mode: split 66.0% train, remainder test

=== Classifier model (full training set) ===

Naive Bayes Classifier

|           | Class  |        |
|-----------|--------|--------|
| Attribute | A      | B      |
|           | (0.46) | (0.54) |

=====

=== Evaluation on test split ===

Time taken to test model on test split: 0 seconds

=== Summary ===

|                                  |           |           |
|----------------------------------|-----------|-----------|
| Correctly Classified Instances   | 5         | 71.4286 % |
| Incorrectly Classified Instances | 2         | 28.5714 % |
| Kappa statistic                  | 0.4615    |           |
| Mean absolute error              | 0.2773    |           |
| Root mean squared error          | 0.5188    |           |
| Relative absolute error          | 49.2501 % |           |
| Root relative squared error      | 89.6763 % |           |
| Total Number of Instances        | 7         |           |

=== Detailed Accuracy By Class ===

|               | TP Rate | FP Rate | Precision | Recall | F-Measure | MCC   | ROC Area | PRC Area | Class |
|---------------|---------|---------|-----------|--------|-----------|-------|----------|----------|-------|
|               | 0,600   | 0,000   | 1,000     | 0,600  | 0,750     | 0,548 | 1,000    | 1,000    | A     |
|               | 1,000   | 0,400   | 0,500     | 1,000  | 0,667     | 0,548 | 1,000    | 1,000    | B     |
| Weighted Avg. | 0,714   | 0,114   | 0,857     | 0,714  | 0,726     | 0,548 | 1,000    | 1,000    |       |

=== Confusion Matrix ===

a b <-- classified as  
3 2 | a = A  
0 2 | b = B

Table S4. DURUM WHEAT

=== Run information ===

Scheme: weka.classifiers.bayes.NaiveBayes

Relation: WekaExcel-weka.filters.unsupervised.instance.Randomize-S42-weka.filters.unsupervised.instance.RemovePercentage-P80.0

Instances: 25

Test mode: split 66.0% train, remainder test

=== Classifier model (full training set) ===

Naive Bayes Classifier

```

      Class
Attribute  A    B
      (0.48) (0.52)
=====
```

=== Evaluation on test split ===

Time taken to test model on test split: 0 seconds

=== Summary ===

|                                  |           |        |
|----------------------------------|-----------|--------|
| Correctly Classified Instances   | 7         | 87.5 % |
| Incorrectly Classified Instances | 1         | 12.5 % |
| Kappa statistic                  | 0.75      |        |
| Mean absolute error              | 0.125     |        |
| Root mean squared error          | 0.3536    |        |
| Relative absolute error          | 24.6753 % |        |
| Root relative squared error      | 69.7042 % |        |
| Total Number of Instances        | 8         |        |

=== Detailed Accuracy By Class ===

|               | TP Rate | FP Rate | Precision | Recall | F-Measure | MCC   | ROC Area | PRC Area | Class |
|---------------|---------|---------|-----------|--------|-----------|-------|----------|----------|-------|
|               | 1,000   | 0,200   | 0,750     | 1,000  | 0,857     | 0,775 | 0,900    | 0,750    | A     |
|               | 0,800   | 0,000   | 1,000     | 0,800  | 0,889     | 0,775 | 0,867    | 0,943    | B     |
| Weighted Avg. | 0,875   | 0,075   | 0,906     | 0,875  | 0,877     | 0,775 | 0,879    | 0,871    |       |

=== Confusion Matrix ===

```
a b <-- classified as
3 0 | a = A
1 4 | b = B
```
